# Supplementary material
Source: publisher figshare collection journal article supplement (https://gsapubs.figshare.com/ndownloader/files/27269402)
Supplement: Supplementary file 1 [file 27269402]

## Sheet: Feuil1
Table DR3. Trace elements composition of titanite from the analyzed specimens of the Swat region.
Spc.	Spot ID	Ca (ppm)	Y (ppm)	Zr (ppm)	Zr 2 SE abs.	La (ppm)	Ce (ppm)	Pr (ppm)	Nd (ppm)	Sm (ppm)	Eu (ppm)	Gd (ppm)	Tb (ppm)	Dy (ppm)	Ho (ppm)	Er (ppm)	Tm (ppm)	Yb (ppm)	Lu (ppm)
H65	A-1	191000	782	20.9	1.7	15.7	110.6	32.7	221	144	43.3	243	54.2	252	31.6	48.8	6.03	22.5	1.95
	A-10	180000	919	15.4	1.8	15.4	116	37	271	200	49	345	73.7	359	42.8	71.7	6	23	1.64
	A-11	178000	1290	20	1.6	13.1	95.8	28.2	202	139	43.3	262	61.3	372	53.7	109	12.3	61.3	4.86
	A-2	184000	1070	17.1	1.9	20	160	41	304	213	52.7	358	72.9	342	40.7	82.8	8.1	32.2	2.62
	A-4	201000	867	20.2	1.3	18.6	143.2	40	319	244	57	389	76.5	359	34.6	53.9	4.81	17	1.3
	A-6	196000	839	18.9	1.6	8.8	68.7	19.6	146	105.1	32.1	171	42.6	216	32.4	69.8	9.19	41.9	4.98
	A-7	188700	880	20.6	2.6	11.1	82.9	22.9	177	120	34.6	191	42.6	237	33.4	66.6	8.4	42.4	4.65
	A-8	211000	1174	21.4	2	22.8	157	43.9	321	259	61.9	454	92.5	486	59.4	78	7.42	28	1.65
	C2-3	191000	1580	21.7	2	15.2	118.4	31.8	254	187	50	385	91.9	477	67.3	144	16.4	56.7	3.81
	C2-4	199000	1190	21	3.2	19.2	139	41.5	301	226	59.6	425	93.3	438	54	72.7	6.9	26.5	1.66
	C3-1	195000	1068	21.3	1.8	10.56	87.2	23.2	177	116	34	231	48.4	254	38.2	84	11.2	48.6	5.33
	C3-2	186000	776	19.1	2.2	12.7	97.5	25.5	207	146	41.5	272	52.2	246	29.5	57.6	6.7	28.3	2.4
	D-1	187000	1049	8.4	1.2	31.4	244	66.9	485	304	63.4	458	92.9	407	49.9	84.5	9.22	38.2	3.48
	D-4	192000	809	14.5	3.1	21.8	174	49.3	355	230	50	321	66.8	291	32.5	54.1	5.58	26.6	2.21
	D-6	191700	1030	8.6	1.3	32.1	227	68	493	297	58.7	412	88.3	378	45.9	77.5	8.64	41.1	2.93
	D-7	189600	1191	6	1.1	23.3	156	48.1	334	225	43.3	350	69.6	353	46	98.6	13.6	79.6	8.56
	D-8	220000	1011	12.5	1.7	24.6	183	53.4	368	245	51.7	371	72.6	337	41.2	70.8	7.25	36.8	3.64
	E-1	194000	591	19.3	1.6	18.7	154	43.1	329	242	51.7	368	60.1	267	26.1	37.9	3.72	16.3	1.05
	E-2	194000	582	18.2	1.3	12	103	28.9	220	163	36.4	235	47	203	21.2	41.2	5.2	27.7	2.59
	E-3	185000	435	17.8	1.8	16.3	122	35.9	254	193	44	285	51.2	190	16.3	23.4	2.2	7.3	0.66
	E-4	189000	840	16.6	1.6	24.9	202	59.5	396	295	64.8	440	90.5	372	38.1	59.8	5.93	26.6	1.67
	E-5	187000	600	18.7	1.3	20.7	172	47.4	325	240	53.1	384	68.4	272	25	37.2	3.45	14.1	0.78
	E-7	195000	952	20.7	1.4	13.5	113	31.2	237	149	41.4	237	51.4	254	36.4	68.5	9.61	46.9	4.19
	E-8	188000	637	22.8	2.6	13.6	107.2	30.4	224	165	41.7	268	50.3	218	23.9	39.1	4.38	17.2	1.59
	E-9	184000	908	21	1.8	13.1	81.5	23.7	154	120	32.7	208	42.4	232	30.8	65.9	9.3	46.5	4.28
	F1-7	175000	1510	20	3.1	9.3	83.5	23.6	162	134	37	277	66.8	379	62	127	14.8	66.8	6.4
	F2-3	197000	889	20	1.9	15.5	115.3	34.7	247	193	45.5	320	64.6	305	33.4	58.1	6.97	31.8	2.72
	F2-4	217000	429	12.9	1.4	12.3	71.7	18.5	125	97	22	147	27.7	142	16.2	30.1	3.54	14.3	1.35
	F2-5	186000	454	15.2	1.6	18.9	145.9	41.4	309	208	56.3	314	52.5	205	17.3	24.5	2.66	11.5	0.92
H37	A-1	200000	8730	12.1	1.4	8.37	63.4	20.2	144	149.1	31.2	348	126.2	1097	300	1228	269	2060	271
	A-2	194000	11190	13.2	1.7	10.63	72.7	21.6	148.8	144.8	29.2	367	154.1	1462	398	1548	268	1610	157.4
	A-3	201400	22300	22.9	2.2	16.3	105.3	30.8	206	206	28.9	561	250	2620	776	2800	512	3050	282
	A-5	194000	8180	18.2	1	6.82	52.4	14.65	99.7	104.4	20.95	280	117.3	1155	284	929	142.9	788	77.6
	B-1	187800	17580	15.1	1.8	14.7	109.7	30.2	230	214	35.8	543	222.1	2140	610	2220	406	2400	236
	B-11	203100	17080	22.2	2.2	12.21	90.7	24.4	180	176	25.3	462	189	2060	563	1910	319	1820	164.5
	B-13	189300	26200	20.7	2.3	19.6	129.8	35.7	274	253	33.8	695	294	3140	958	3560	664	4060	390
	B-14	191000	20500	21.9	2.1	13.58	96.5	25.8	187	178	25.3	514	231	2470	730	2710	468	2610	239
	B-15	186600	8240	19.1	1.4	8.6	62.2	15.91	114.6	114.8	16.6	301	123.1	1169	287	974	182	1071	94.6
	B-2	191000	9650	22.8	1.5	8.02	57.9	15.6	105.8	113	17.1	287	131.5	1316	341	1140	192	976	86
	B-4	192000	20490	21.7	2.4	13.7	101.4	26.4	197	180	26.8	501	222	2480	708	2730	447	2630	227
	B-5	200000	20200	24.3	1.8	14.93	98.9	27	192	188	25.8	498	218	2440	677	2570	489	2710	240
	D-1	201000	19430	19.2	2.1	14.9	107.8	29	224	216	32.9	548	235	2390	664	2440	458	2920	287
	D-2	199800	8430	20	2.2	8.73	62	17.86	136.9	128.7	21.4	318	128	1191	302	1045	183	1131	111.8
	D-4	195000	13790	21.9	2	9.5	70.6	19.6	144	128.3	21.8	372	160.7	1770	477	1551	240	1257	104.5
	D-5	198700	21800	15.2	1.7	16.7	124.5	37.2	269	258	36.8	629	261	2680	754	2890	502	3190	306
	D-6	193800	13140	14.8	1.7	13.9	111	31.5	231	212	35.9	484	178	1656	425	1442	245	1436	137.9
	D-7	193500	18900	19.2	2.6	17.9	129.1	34.5	276	229	39.2	593	244	2310	625	2320	435	2650	264
	D-8	188000	13180	13.61	0.96	12.59	88	25.9	192	179	33.9	449	164.5	1567	412	1481	273	1626	176.8
	E-10	175000	27200	16.5	1.8	18.1	126	34.5	246	250	32.7	674	300	3170	931	3360	696	4520	396
	E-13	203000	21800	13.7	1.9	14.5	113.2	29.8	227	233	34.7	568	255	2790	751	2730	538	3330	298
	E-15	193000	14600	11.1	1.1	10.6	86.3	23.4	172	177	31	498	210	1810	493	1580	261	1630	146
	E-2	189000	22500	19	3	13.32	105	27.3	206	193	24.8	535	232	2790	807	2910	526	3280	289
	E-3	183000	20300	17.8	2.3	13.78	103.9	28.8	201	187	24.1	533	238	2510	728	2800	530	2890	262
	E-7	186000	6110	16.7	2.2	3.9	35.3	10.2	71	75	11.4	211	98	945	216	619	88.1	441	34.9
	E-8	188000	16900	19	3.1	10.81	83.3	22.7	151	154	18.9	422	194	1940	556	2110	363	2260	215
	E-9	201000	19500	17.3	2.1	16.4	111	34.3	232	223	35.2	629	255	2520	721	2440	455	2930	267
	F-2	186000	3520	17.3	2	4.11	30.1	8.55	59	69.6	8.05	176	72.4	636	133	324	43.3	208	17.3
	F-3	189000	5000	18.1	1.9	4.57	31.9	9.86	72.1	77.8	10.7	217	87.5	866	185	552	69.4	324	26.9
	G-10	209000	11700	21.2	1.8	9.48	71.6	20.8	144	151	21.4	394	159	1600	386	1410	243	1410	142
	G-12	191000	6130	18.2	2	5.69	49	13.64	94.6	95.3	16.2	255	103.2	946	208	730	119	743	70
	G-14	189000	5570	19.3	1.9	5.02	42	11.56	83.8	89.2	13	243	96	860	211	536	81.6	424	35.6
	G-15	185200	19860	16.4	1.2	15.75	122	33	228	224	34.3	612	246	2580	714	2790	476	2980	289
	G-16	196000	18500	17.8	2.1	16	112.9	31.8	238	207	33.9	562	243	2401	645	2540	456	2840	253
	G-4	188000	25300	20.8	2.3	18.2	131	35.2	249	239	32.8	693	277	2990	891	3390	643	3780	357
	G-6	201000	9370	20.9	2.2	9.56	66.6	17.5	126	124.8	19.1	324	139	1404	351	1230	217	1200	111
	G-7	193000	8290	12.4	1.1	7.78	62.1	17.2	135.3	139	26.9	330	131	1243	305	1077	192	1250	121.9
	G-8	197000	12380	15.4	1.6	8.55	61.8	18.8	126.3	139.4	25.2	365	148	1530	405	1510	287	1680	161
	G-9	196000	5330	9.9	1.7	4.87	48.5	13.1	100.3	102	28.3	252	86.3	772	195.2	639	119.9	808	89.4
	G2-1	187000	13580	20.5	2.5	12.7	82.1	22.1	165	163	23	433	171.8	1747	496	1790	315	2030	191
	G2-2	196000	10920	20.3	1.8	9.8	65.3	18.6	135.8	136	21.8	376	148	1444	394	1302	241	1370	117.4
	G2-4	204000	11360	16.6	1.6	9.71	76.2	21.8	155	156	24.2	390	162	1544	389	1390	244	1500	148
	G2-5	183000	24700	19.7	2.2	20.7	142	36.8	238	242	33.1	645	281	3130	860	3370	600	3750	347
	G2-6	196200	12710	20.4	1.8	11.7	98.9	20.6	140	148	21.3	365	163.6	1688	424	1490	261	1459	135.7
	G2-7	195000	13270	20.9	2.3	10.5	71.1	18.9	125	134.1	20.4	378	167.7	1900	482	1611	265	1504	139.1
	G2-8	193400	15360	20.6	2.2	9.23	72.5	20.1	155	157	23.7	421	192	2040	536	1790	283	1525	126.5
	G2-9	194600	19360	20.3	1.4	17.1	111.5	31.9	215	223	31.1	561	243	2410	665	2570	509	3040	297

## Sheet: G48803
Soret, M., et al., 2021, How Himalayan collision stems from subduction: Geology, v. 49, https://doi.org/10.1130/G48803.1
